# Supplementary material
Source: PubMed Central journal article supplement (PMC2821798)
Supplement: hfp203_1.pdf [file hfp203_1.pdf]

## APPENDICES

**TABLE A1: Hazard rate ratios\* of incident HF hospitalization by self-reported Gothenburg score overall and by obesity, hypertension, and diabetes status at baseline among 15,430 ARIC Study participants, 1987-2004**

| Score | Overall           | <u>Obese</u>      |                   | <u>Hypertension</u> |                    | <u>Diabetes</u>   |                   |
|-------|-------------------|-------------------|-------------------|---------------------|--------------------|-------------------|-------------------|
|       |                   | BMI $\geq$ 30     | BMI < 30          | Yes                 | No                 | Yes               | No                |
| 0     | 1.                | 1.                | 1.                | 1.                  | 1.                 | 1.                | 1.                |
| 1     | 1.23 (1.07, 1.42) | 1.38 (1.11, 1.73) | 1.36 (1.13, 1.63) | 1.36 (1.11, 1.67)   | 1.57 (1.29, 1.90)  | 1.53 (1.18, 1.99) | 1.36 (1.16, 1.61) |
| 2     | 2.17 (1.92, 2.43) | 2.14 (1.79, 2.55) | 2.32 (1.98, 2.73) | 1.96 (1.68, 2.29)   | 2.71 (2.27, 3.25)  | 2.17 (1.76, 2.67) | 2.25 (1.95, 2.60) |
| 3     | 3.98 (3.37, 4.70) | 3.52 (2.81, 4.40) | 4.44 (3.45, 5.72) | 2.81 (2.31, 3.42)   | 8.27 (5.92, 11.54) | 3.45 (2.66, 4.49) | 4.04 (3.24, 5.03) |

\*Adjusted for age, sex, and race; ARIC, Atherosclerosis Risk in Communities study; CI, confidence interval; HF, heart failure, HRR, hazard rate ratio;
